# Supplementary material
Source: Springer Nature journal article supplement (https://www.springermedizin.de/resource/supplementary/12902_2014_237_MOESM2_ESM.pdf/9515858)

**A**  
< 401 - 15 >

R

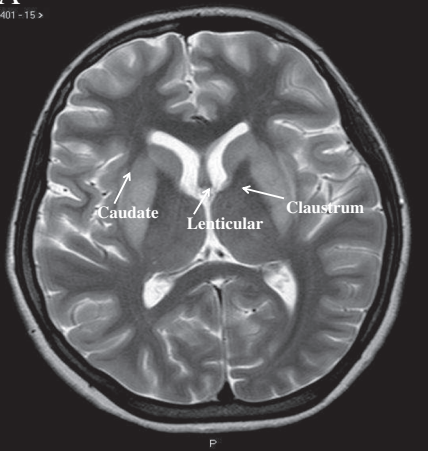

P

**B**  
< 501 - 17 >

R

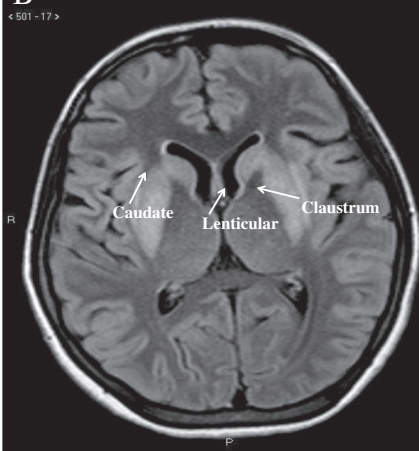

P

**C**

< 701 - 13 >

R

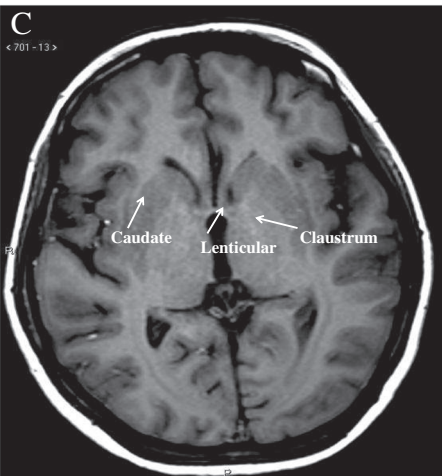

P

Supplement: MOESM2 [file 9515858]
